# Supplementary material for: Improved Metabolite Prediction Using Microbiome Data-Based Elastic Net Models
Source: PubMed Central journal article supplement (PMC8573316; doi:10.3389/fcimb.2021.734416), 2021-10-25

# Sup-Figure 1

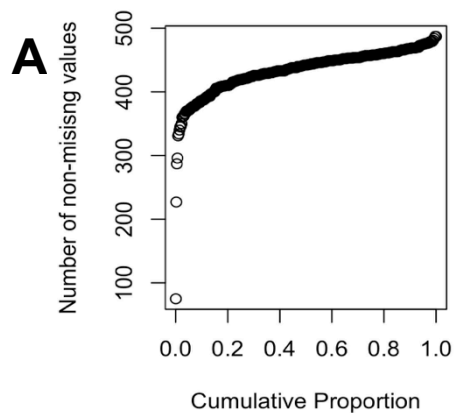

Focus on the tail of the distribution

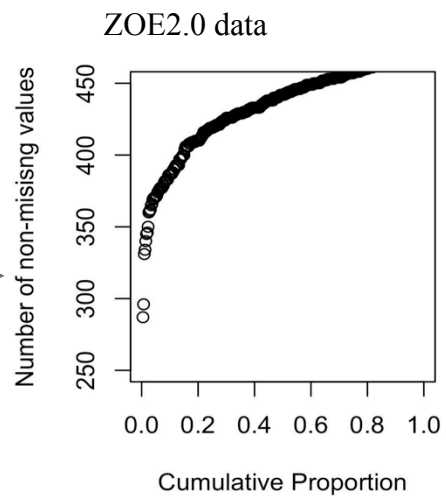

Remove samples whose missing values number is smaller than 351 (n = 10)

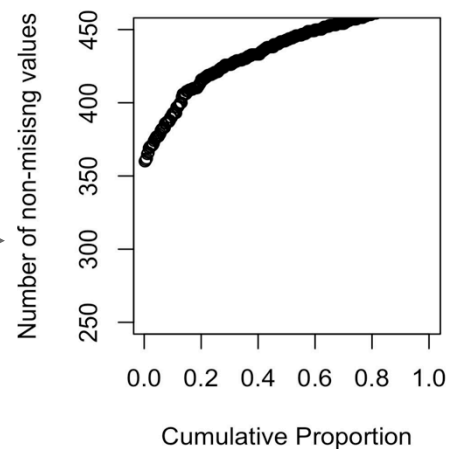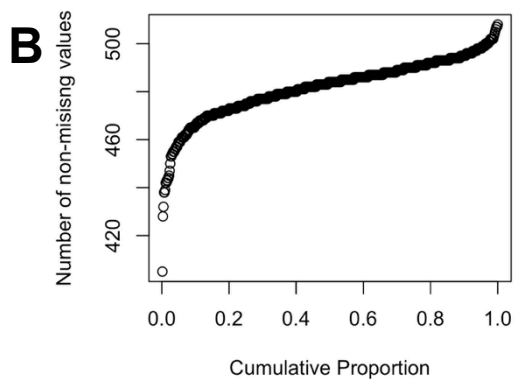

Focus on the tail of the distribution

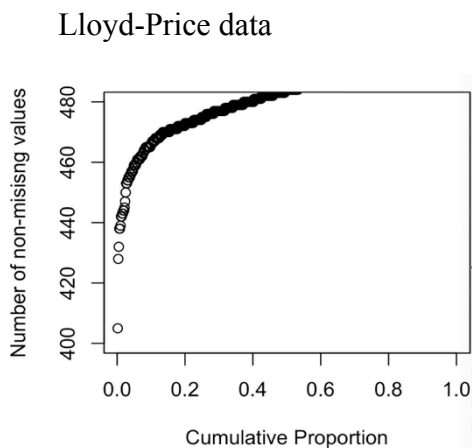

Remove samples whose missing values number is smaller than 450 (n = 15)

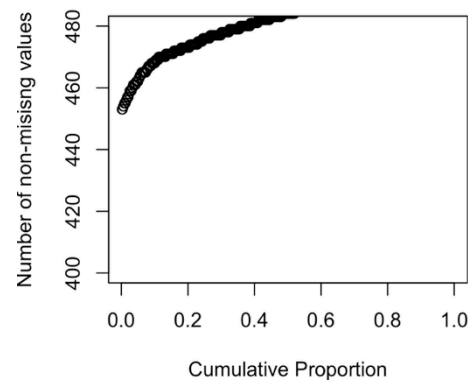

Supplement: Image_1.pdf [file Image_1.pdf]
