# Supplementary material for: Improved Metabolite Prediction Using Microbiome Data-Based Elastic Net Models
Source: PubMed Central journal article supplement (PMC8573316; doi:10.3389/fcimb.2021.734416), 2021-10-25

### ZOE2.0

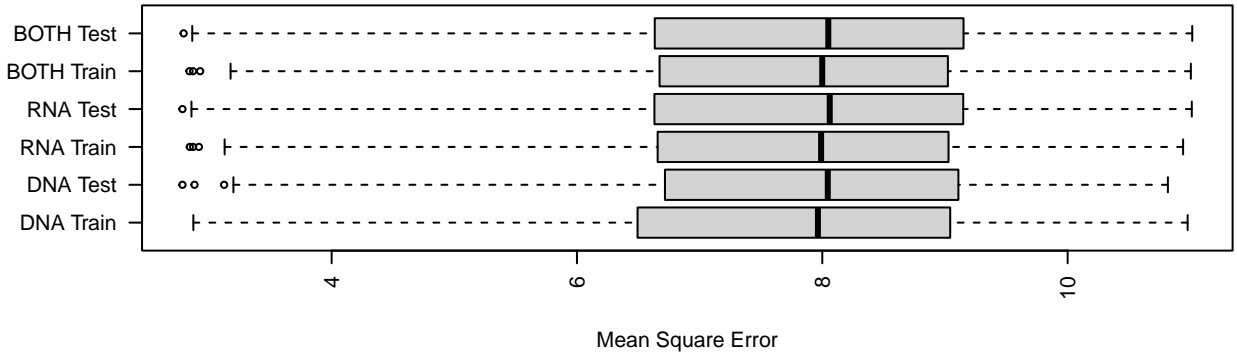

### Lloyd-Price

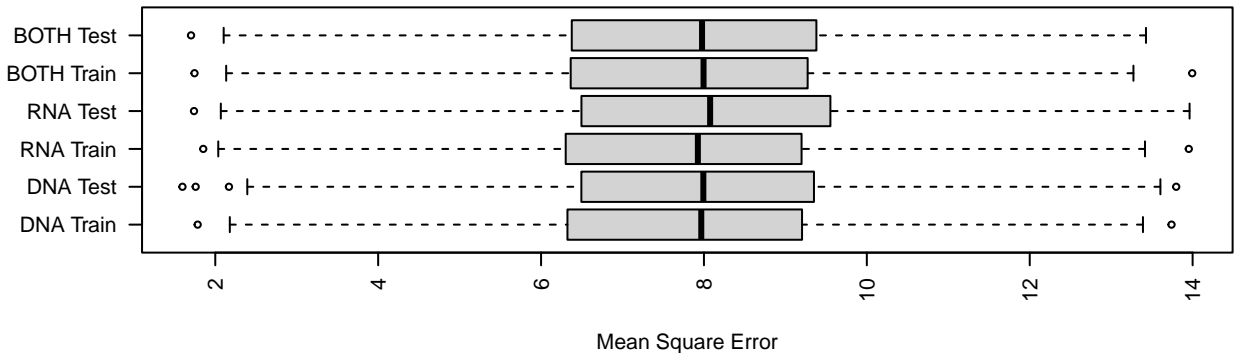

### Mallick

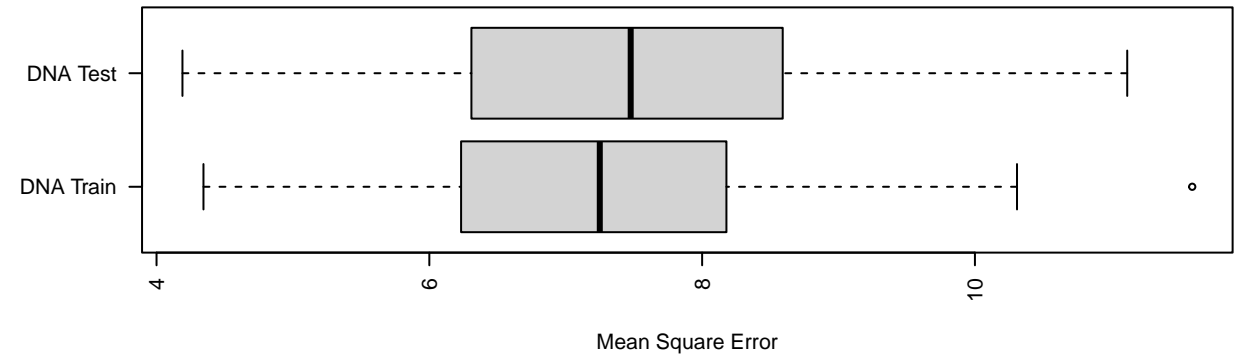

Supplement: Image_4.pdf [file Image_4.pdf]
